# Supplementary material for: Facile conversion of levulinic acid to γ-valerolactone using a high surface area magnetically separable Ni/NiO catalyst
Source: Royal Society of Chemistry journal article supplement (doi:10.1039/c8se00274f), 2018-01-01
Supplement: c8se00274f1.pdf [file c8se00274f1.pdf]

**Facile Conversion of Levulinic acid to  $\gamma$ -Valerolactone using, high surface area magnetically separable Ni/NiO catalyst**

Hari Singh<sup>a, b</sup>, Nishant Iyengar<sup>a, b</sup>, Rajkumar Yadav<sup>a, b</sup>, Aditya Rai<sup>a, b</sup> and Anil K. Sinha<sup>a, b</sup>

<sup>a</sup>CSIR- Indian Institute of Petroleum, Dehradun – 248005, India; <sup>b</sup>Academy of Scientific and Innovative Research (AcSIR), CSIR-IIP, Dehradun-248 005, India;

\*Corresponding author. E-mail: [asinha@iip.res.in](mailto:asinha@iip.res.in), Fax: +91-135-266-203; Tel: +91-1352525842

**Supplementary Information**

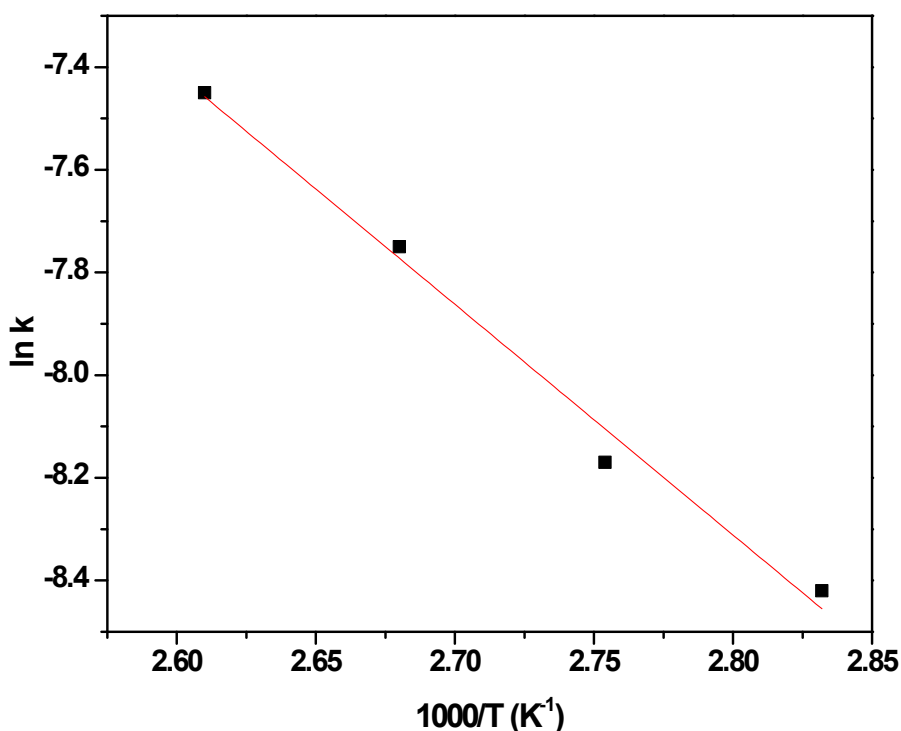

**Fig. S1:** Variation of  $\ln k$  v/s  $1000/T$  ( $K^{-1}$ ) for the determination of activation energy.

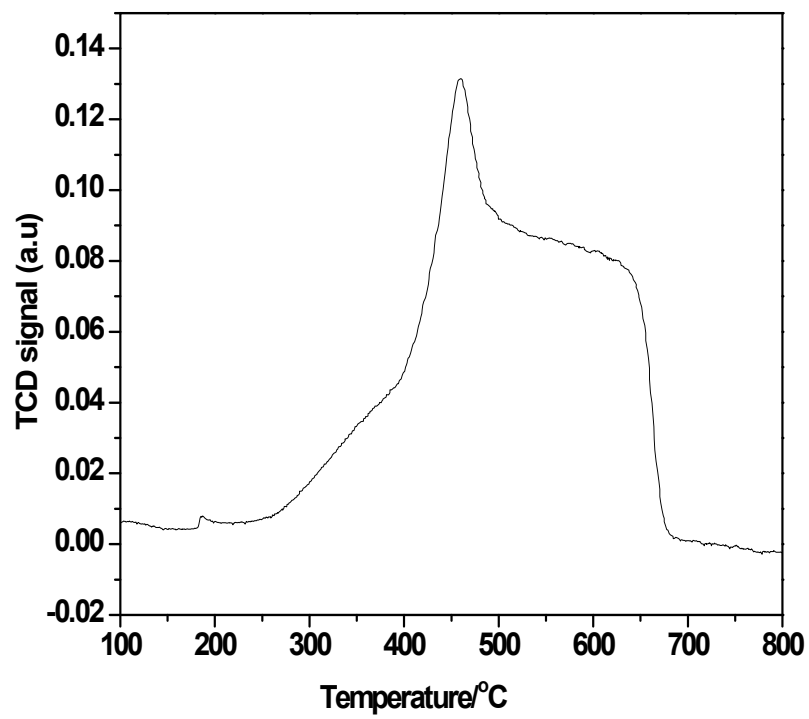

**Fig. S2a:** Ammonia TPD profile of Ni/NiO catalyst

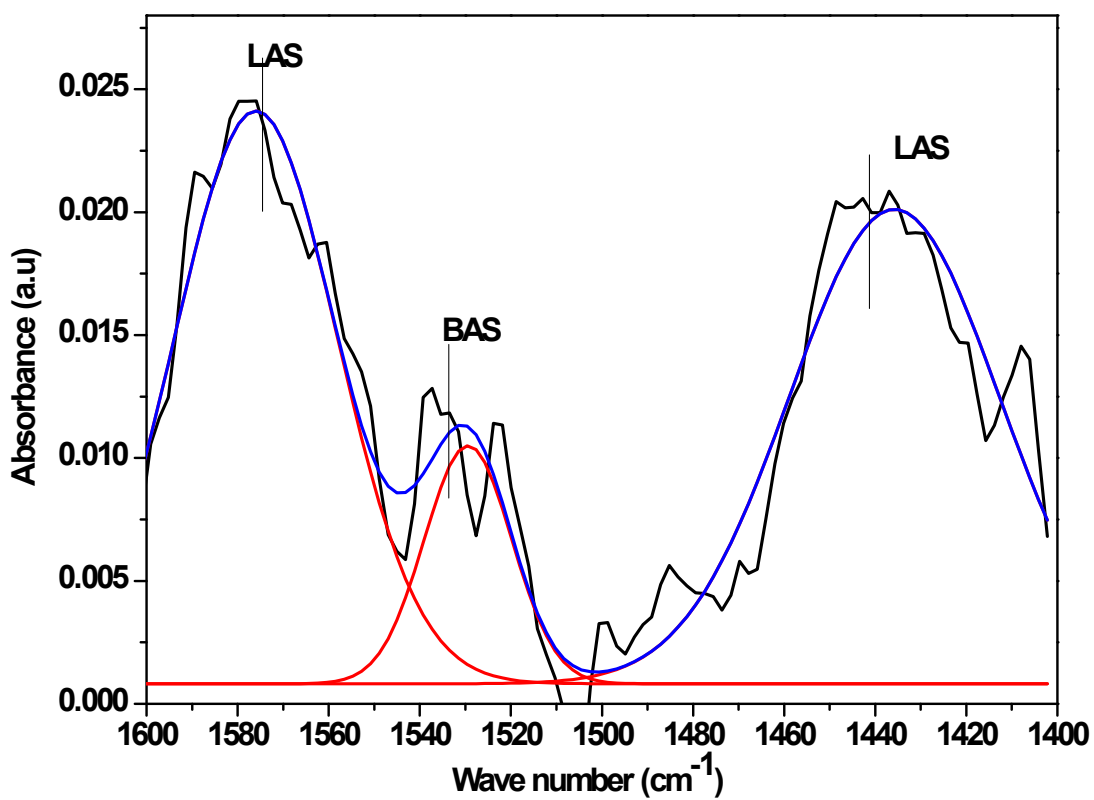

**Fig. S2b:** Pyridine adsorbed FTIR spectrum of Ni/NiO catalyst

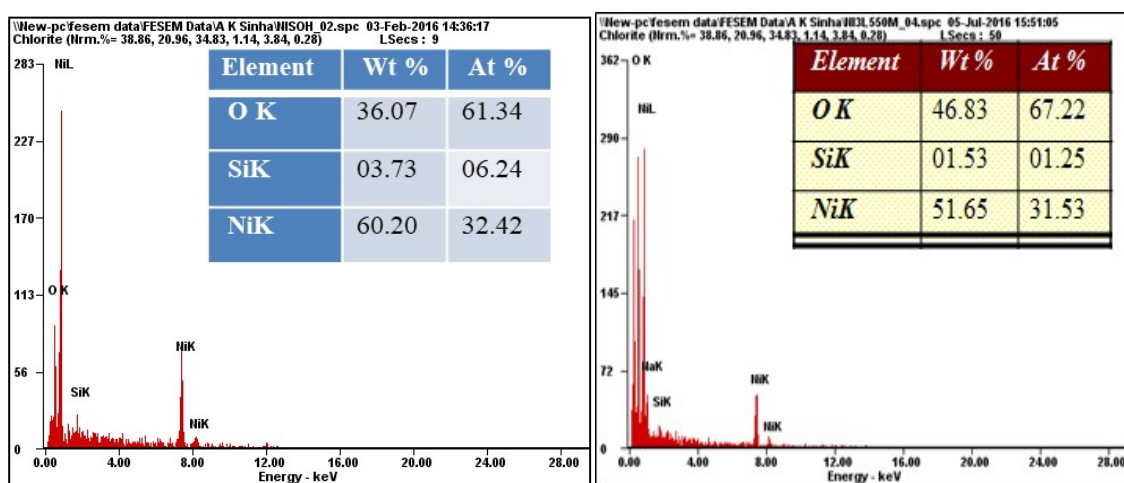

**Fig. S3:** SEM-EDAX spectra of unleached (a) leached (b) Ni/NiO catalyst

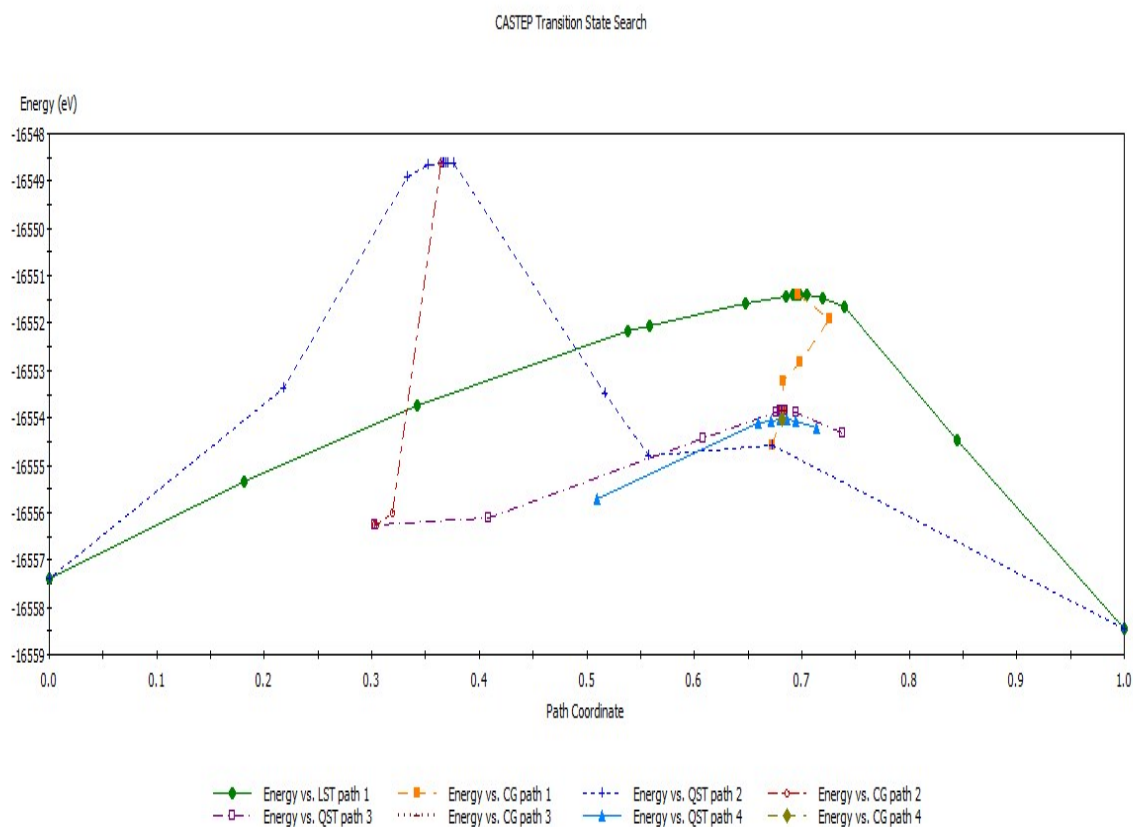

**Fig. S4:** Transition state energy profile on NiO(Ni) surface vs. different paths.

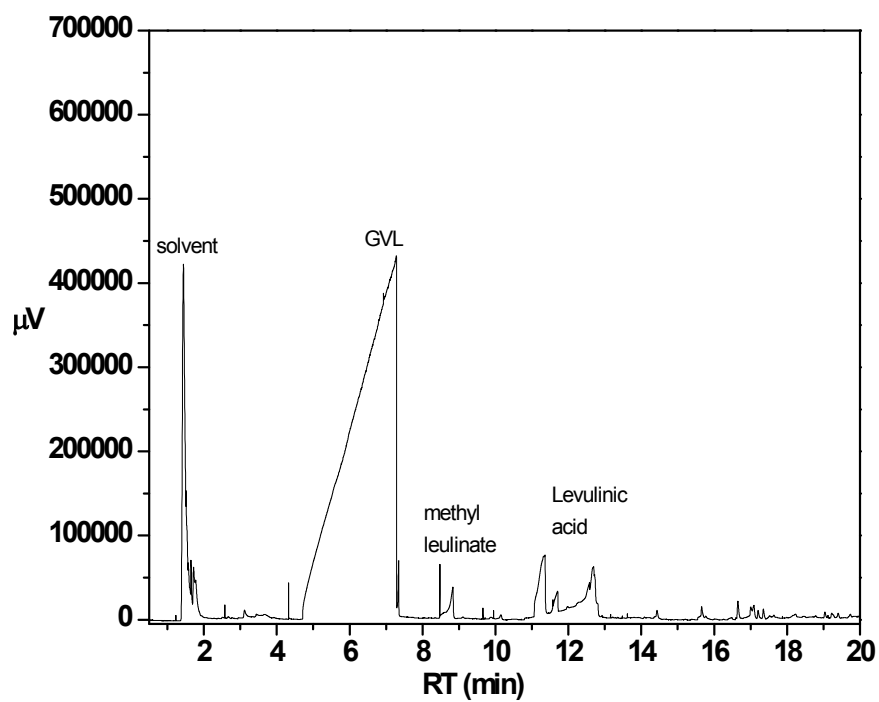

Figure S5: Gas chromatograms of the product mixture after the conversion of LA to GVL over Ni/NiO catalyst.

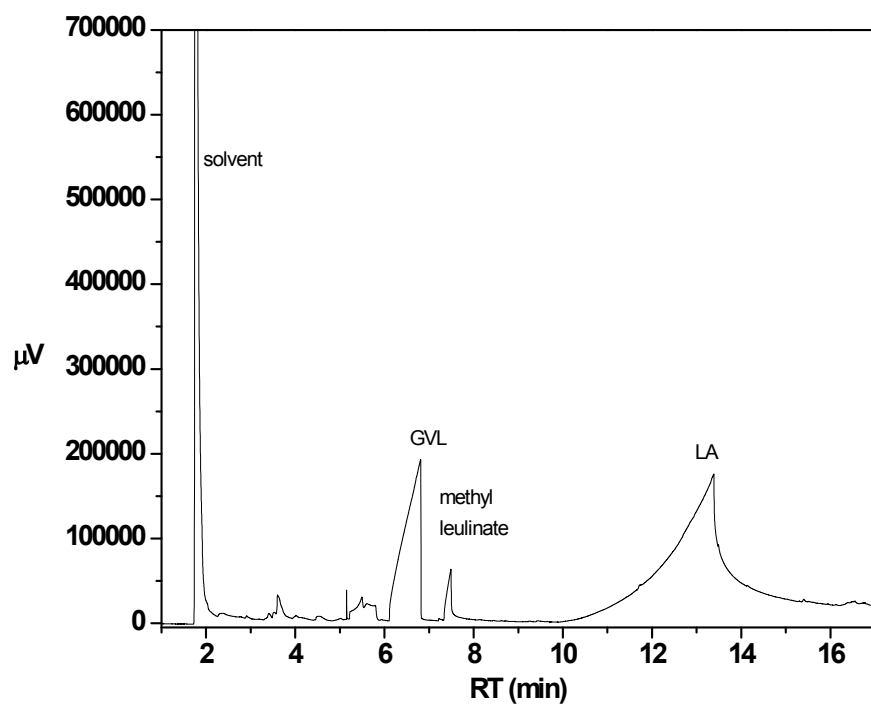

Figure S6: Gas chromatograms of the product mixture after the conversion of LA to GVL over  $\text{Ni}/\text{Al}_2\text{O}_3$  catalyst.

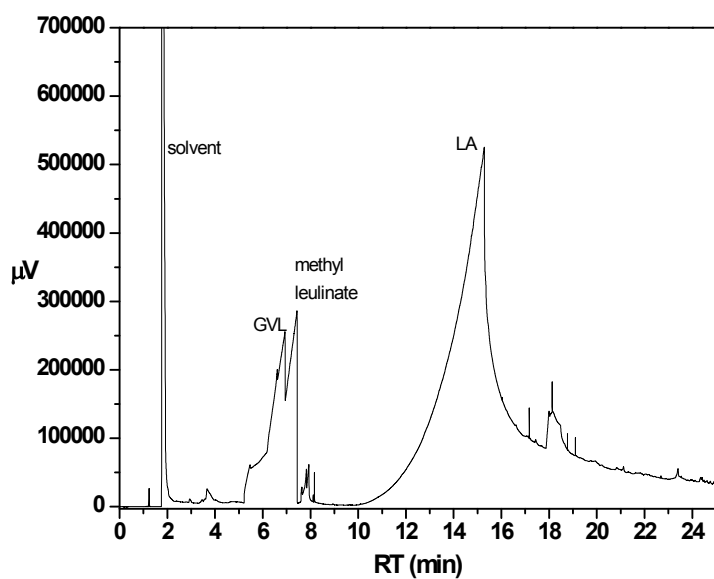

Figure S7: Gas chromatograms of the product mixture after the conversion of LA to GVL over Raney Ni catalyst.

| Entry | catalyst               | Composition     |                  |
|-------|------------------------|-----------------|------------------|
|       |                        | Ni/Si (ICP-AES) | Ni/Si (TEM-EDAX) |
| 1     | Fresh leached Ni/NiO   | 51              | 36               |
| 2     | Fresh unleached Ni/NiO | 30              | 24               |
| 3     | Spent Ni/NiO           | 50              | 35               |

**Table S1.** The composition of fresh leached, unleached Ni/NiO and Ni/NiO spent catalyst from ICP-AES and TEM.

| Catalyst                          | $S_{\text{BET}}(\text{m}^2/\text{g})$ | Pore vol.<br>(ml/g) | Pore dia.<br>(nm) | Crystal size<br>(nm)## | Metal Dispersion           |                          |
|-----------------------------------|---------------------------------------|---------------------|-------------------|------------------------|----------------------------|--------------------------|
|                                   |                                       |                     |                   |                        | H <sub>2</sub> -chemisorp. | XRD and TEM <sup>#</sup> |
| Ni/NiO                            | 250                                   | 0.40                | 8                 | 7                      | 18                         | 15                       |
| Raney Ni[32]                      | 56                                    | 0.15                | 7                 | 5                      | 5                          | -                        |
| Ni/Al <sub>2</sub> O <sub>3</sub> | 110                                   | 0.43                | 6                 | -                      | -                          | -                        |

**Table S2:** Surface area, pore volume, mean pore diameter of different catalysts

##Crystal size was determined by the Scherrer equation from Ni (111) plane in XRD patterns

# The mean particle diameter of the nickel particles and dispersion calculated from XRD<sup>33</sup>

| Entry # | Catalyst conc.<br>(%) | Conversion (%) | Selectivity(GVL) | Selectivity<br>(ML) |
|---------|-----------------------|----------------|------------------|---------------------|
| 1       | 2                     | 63             | 76               | 24                  |
| 2       | 10                    | 99             | 94               | 6                   |
| 3       | 20                    | 99             | 93               | 6                   |

**Table S3:** Catalytic Hydrogenation of levulinic acid at 120 °C and 40 bar at three different catalyst concentrations (Reaction time: 4h; Solvent: Methanol).

We performed the catalytic reaction at three different catalyst concentrations, viz., 2wt%, 10wt% and 20wt% relative to the amount of the substrate. The results are shown in Table 1 for the 110 °C and 40 bar H<sub>2</sub> pressure. The results show that the optimum concentration of the reaction is 10wt%. We performed the remaining catalytic reactions at this concentration.

| Entry # | Catalyst     | Total Conversion<br>(%) | Selectivity<br>(GVL) | Selectivity (ML) |
|---------|--------------|-------------------------|----------------------|------------------|
| 1       | Fresh Ni/NiO | 99                      | 94                   | 8                |
| 2       | Used (1)     | 96                      | 93                   | 7                |
| 3       | Used (2)     | 95                      | 92                   | 6                |
| 4       | Used (3)     | 94                      | 92                   | 6                |

**Table S4:** Reusability study of the Ni/NiO catalyst. Conditions are 120 °C and 40 bar.

| Entry # | Temperature<br>(°C) | Pressure<br>(bar) | Conversion (%) | Selectivity of $\gamma$ -<br>valerolactone |
|---------|---------------------|-------------------|----------------|--------------------------------------------|
| 1       | 120                 | 40                | 93             | 100                                        |
| 2       | 140                 | 40                | 94             | 100                                        |
| 3       | 170                 | 40                | 94             | 100                                        |
| 4       | 200                 | 40                | 95             | 100                                        |

**Table S5.** Catalytic Hydrogenation of levulinic acid under solvent-free conditions. Reaction time -4 h.

Table S5 shows the solventless selective hydrogenation of levulinic acid to produce  $\gamma$ -valerolactone with 100% selectivity and 93% conversion of levulinic acid into GLV at 120 °C under 40 bar H<sub>2</sub> pressure. It is observed that on increasing temperature from 120 to 200 °C at 40 bar H<sub>2</sub> pressure, the conversion increases from 93% to 95%.

| Entry # | Temperature (°C) | Pressure<br>(bar) | Total<br>Conversion | Selectivity<br>(GVL) | Selectivity<br>(ML) |
|---------|------------------|-------------------|---------------------|----------------------|---------------------|
| 1       | 80               | 10                | 82                  | 60                   | 40                  |
| 2       | 80               | 20                | 88                  | 78                   | 22                  |
| 3       | 80               | 30                | 91                  | 84                   | 16                  |
| 4       | 80               | 40                | 92                  | 90                   | 10                  |
| 5       | 90               | 10                | 85                  | 62                   | 38                  |
| 6       | 90               | 20                | 88                  | 82                   | 18                  |
| 7       | 90               | 30                | 93                  | 85                   | 15                  |
| 8       | 90               | 40                | 95                  | 91                   | 09                  |
| 9       | 100              | 10                | 87                  | 58                   | 42                  |
| 10      | 100              | 20                | 90                  | 75                   | 25                  |
| 11      | 100              | 30                | 94                  | 83                   | 17                  |
| 12      | 100              | 40                | 97                  | 90                   | 10                  |
| 13      | 120              | 10                | 88                  | 57                   | 43                  |
| 14      | 120              | 20                | 93                  | 76                   | 24                  |
| 15      | 120              | 30                | 98                  | 87                   | 23                  |
| 16      | 120              | 40                | 99                  | 94                   | 08                  |

**Table S6:** Catalytic Hydrogenation of levulinic acid under different conditions with 10 wt% catalyst concentration (Reaction time: 4h; Solvent: Methanol).

### Study of the reaction parameters

The parameters of the reaction, the order of the reaction and activation energy were calculated. For the conversion data presented for temperatures between 80-120 °C, there is a continuous increase in GVL yield with H<sub>2</sub> pressure at the expense of ML (Table S6). We can conclude, therefore, that the conversion of LA to GVL is the dominant pathway. We have, consequently, reported the kinetics study of this reaction pathway.

### Order of reaction for H<sub>2</sub>

The order of the reaction for H<sub>2</sub> has been studied at five different temperatures (80-120 °C) (Table S6). For all these four temperatures, four pressures of H<sub>2</sub> gas have been used (10, 20, 30 and 40 bar) and the order has been calculated from the place. In our case, the concentration of H<sub>2</sub> was calculated to between 0.31-1.36 M. The order of the reaction is calculated as 0.47±0.06.

| Entry | Conc. of LA (M) | Conversion (%) | Selectivity of GVL (%) |
|-------|-----------------|----------------|------------------------|
| 1     | 1.52            | 99             | 92                     |
| 2     | 2.87            | 99             | 94                     |
| 3     | 4.64            | 99             | 94                     |

**Table S7.** Variation in the conversion of LA and selectivity of GVL with the concentration of LA. The reaction has been performed at 110 °C and 40 bar in methanol solvent.

### Order of reaction for LA

Three different amounts of LA were used at the best reaction conditions, i.e., 110°C and 40 bar pressure. The results are tabulated in Table S7. The volume of the solvent was adjusted in each case so that the net volume of the reaction mixture was 20 ml. The concentrations of LA in methanol in these three reaction mixtures were 1.52 M, 2.87 M and 4.64 M. The results indicate a conversion that is nearly independent of the LA concentration. The calculated order was  $0.04 \pm 0.01$ .

| Entry # | Catalyst                                | Total Conversion<br>(%) | Selectivity<br>(GVL) | Selectivity (ML) |
|---------|-----------------------------------------|-------------------------|----------------------|------------------|
| 1       | Fresh Ni/Al <sub>2</sub> O <sub>3</sub> | 89                      | 90                   | 10               |
| 2       | Used (1)                                | 45                      | 78                   | 22               |
| 3       | Used (2)                                | 40                      | 70                   | 30               |
| 4       | Used (3)                                | 35                      | 70                   | 30               |

**Table S8:** Reusability study of the Ni/Al<sub>2</sub>O<sub>3</sub> catalyst. Conditions are 110 °C and 40 bar.  
(Reaction time: 4h, 10wt% catalyst, LA 5 ml, methanol 15 ml).

| Entry # | Catalyst | Total Conversion<br>(%) | Selectivity<br>(GVL) | Selectivity (ML) |
|---------|----------|-------------------------|----------------------|------------------|
| 1       | Raney Ni | 90                      | 87                   | 13               |
| 2       | Used (1) | 50                      | 80                   | 20               |
| 3       | Used (2) | 35                      | 75                   | 25               |
| 4       | Used (3) | 35                      | 75                   | 25               |

**Table S9:** Reusability study of the Raney Ni catalyst. Conditions are 110 °C and 40 bar.  
(Reaction time: 4h, 10wt% catalyst, LA 5 ml, methanol 15 ml).
